# Supplementary material
Source: Research Square preprint supplement (doi:10.21203/rs.3.rs-9399529/v1)
Supplement: Supplementary file 1 [file 76a3767e506ecd2da1f2b2fe.docx]

**Supplementary Table 1:**

**COSMIN Reporting Guideline (Version 2.0) – General Reporting Recommendations**

| **Item** | **Item name** | **Item description** | **Manuscript page no.** |
| --- | --- | --- | --- |
| T1 | Title | Identify the report as a study of one or more measurement properties of a specific PROM to measure a specified construct in a specified population. | 1 |
| A1 | Objectives | Provide the specific objective(s) of the research, specifying the PROM, measurement properties, and study characteristics. | 4 |
| A2 | Design | Specify the study design used to evaluate the measurement properties. | 4 |
| A3 | Methods | Specify the methods for evaluating each measurement property. | 4-7 |
| A4 | Results | Provide the main results for all measurement properties evaluated. | 7-11 |
| A5 | Discussion/Conclusions | Provide implications of the findings in the context of existing evidence. | 11-12 |
| I1 | PROM | Specify the name, version, and constructs of the PROM. | 4,5 |
| I2 | Target population & context of use | Specify the target population and context of use for the PROM. | 4 |
| I3 | State of knowledge & rationale | Describe current knowledge and justify why the study is necessary. | 2-4 |
| I4 | Objectives | State specific objectives including PROM, properties evaluated, and sample characteristics. | 4 |
| GM1 | Study design | Specify the study design used. | 4 |
| GM2 | Participants | Describe participant selection and inclusion/exclusion criteria. | 4 |
| GM3 | PROM details | Provide details on PROM structure, scoring, administration, and setting. | 4,5 |
| GM4 | Additional data collection | Describe why and how additional data were collected. | 4,5 |
| GM5 | Time points | Provide all time points of measurements. | 4,5 |
| GM6 | Sample size justification | Provide rationale for sample size. | 4 |
| GM7 | Statistical analyses | Describe analyses, criteria for good properties, and software used. | 6 |
| GM8 | Missing data | Describe handling of missing data. |  |
| GM9 | Unplanned analyses | Specify unplanned analyses and rationale. | - |
| GR1 | Participant characteristics | Provide participant characteristics. | 4 |
| GR2 | Sample size | Provide total and analysis-specific sample sizes. | 4 |
| GR3 | Missing data | Provide amount and reasons for missing data. |  |
| GR4 | Results | Describe results corresponding to objectives. | 7-11 |
| DC1 | Measurement property evidence | Summarize main findings for each property. | 11-12 |
| DC2 | Practical relevance | Discuss practical implications for PROM use. | 11-12 |
| DC3 | Strengths and limitations | Discuss strengths and limitations. | 12 |
| DC4 | Generalisability | Discuss applicability to other populations. | 12 |
| DC5 | Instrument changes | Discuss needed PROM modifications. | - |
| DC6 | Future research | Describe future research needs. | 12 |
| DC7 | Conclusions | Provide overall conclusions for PROM use. | 12 |
| O1 | Conflict of interest | State conflicts of interest related to the PROM. | 14 |

**Supplementary Table 2: Spearman Correlational construct validity among three instruments**

| Instrument | DCUI | EQ-5D-Y-5L | CPQ11-14 |
| --- | --- | --- | --- |
|  | **rhoa** | **rhoa** | **rhoa** |
| DCUI |  | 0.3017* | -0.4642* |
| EQ-5D-Y-5L | 0.3017* |  | -0.4901* |
| CPQ11-14 | -0.4642* | -0.4901* |  |

*aSpearman's correlation coefficient *Significance at p<0.001*

(DCUI, Dental Caries Utility Index)

**Supplementary Table 3: Correlation between each item of the three instruments**

|  | **CPQ 11-14** | | | | | | | | **DCUI** | | | | | **EQ-5D-Y-5L** | | | | |
| --- | --- | --- | --- | --- | --- | --- | --- | --- | --- | --- | --- | --- | --- | --- | --- | --- | --- | --- |
|  | Item 1 | Item 2 | Item 3 | Item 4 | Item 5 | Item 6 | Item 7 | Item 8 | pain | eat_ | worry | abla | appr | mo | sc | ua | pd | ad |
| Item 1 | 1.000 |  |  |  |  |  |  |  |  |  |  |  |  |  |  |  |  |  |
| Item 2 | 0.321 | 1.000 |  |  |  |  |  |  |  |  |  |  |  |  |  |  |  |  |
| Item 3 | 0.483 | 0.443 | 1.000 |  |  |  |  |  |  |  |  |  |  |  |  |  |  |  |
| Item 4 | 0.297 | 0.231 | 0.312 | 1.000 |  |  |  |  |  |  |  |  |  |  |  |  |  |  |
| Item 5 | 0.292 | 0.178 | 0.199 | 0.283 | 1.000 |  |  |  |  |  |  |  |  |  |  |  |  |  |
| Item 6 | 0.364 | 0.222 | 0.238 | 0.315 | 0.778 | 1.000 |  |  |  |  |  |  |  |  |  |  |  |  |
| Item 7 | 0.268 | 0.154 | 0.194 | 0.195 | 0.255 | 0.260 | 1.000 |  |  |  |  |  |  |  |  |  |  |  |
| Item 8 | 0.258 | 0.222 | 0.222 | 0.295 | 0.497 | 0.498 | 0.242 | 1.000 |  |  |  |  |  |  |  |  |  |  |
| pain | -0.346 | -0.216 | -0.283 | -0.239 | -0.315 | -0.297 | -0.182 | -0.227 | 1.000 |  |  |  |  |  |  |  |  |  |
| eat | -0.282 | -0.132 | -0.360 | -0.231 | -0.227 | -0.249 | -0.200 | -0.180 | 0.585 | 1.000 |  |  |  |  |  |  |  |  |
| worry | -0.138 | -0.216 | -0.066 | -0.060 | -0.165 | -0.235 | -0.030 | -0.152 | 0.278 | 0.197 | 1.000 |  |  |  |  |  |  |  |
| ablpa | -0.207 | -0.128 | -0.156 | -0.291 | -0.226 | -0.233 | -0.103 | -0.231 | 0.227 | 0.304 | 0.145 | 1.000 |  |  |  |  |  |  |
| apper | -0.109 | -0.122 | -0.085 | -0.253 | -0.374 | -0.299 | -0.081 | -0.280 | 0.238 | 0.181 | 0.289 | 0.284 | 1.000 |  |  |  |  |  |
| mo | 0.067 | -0.064 | -0.019 | 0.046 | 0.145 | 0.172 | 0.145 | 0.218 | -0.052 | -0.142 | 0.045 | -0.218 | 0.011 | 1.000 |  |  |  |  |
| sc | 0.117 | 0.089 | 0.128 | 0.181 | 0.173 | 0.129 | 0.187 | 0.301 | -0.158 | -0.122 | -0.188 | -0.024 | -0.278 | 0.044 | 1.000 |  |  |  |
| ua | 0.175 | 0.055 | 0.158 | 0.157 | 0.298 | 0.294 | 0.228 | 0.360 | -0.201 | -0.230 | -0.092 | -0.263 | -0.179 | 0.315 | 0.300 | 1.000 |  |  |
| pd | 0.403 | 0.206 | 0.269 | 0.222 | 0.323 | 0.329 | 0.291 | 0.391 | -0.269 | -0.292 | -0.172 | -0.182 | -0.201 | 0.227 | 0.130 | 0.343 | 1.000 |  |
| ad | 0.214 | 0.007 | 0.059 | 0.049 | 0.417 | 0.411 | 0.225 | 0.377 | -0.109 | -0.123 | -0.124 | -0.275 | -0.302 | 0.201 | 0.127 | 0.315 | 0.448 | 1.000 |
